# Supplementary material for: Neuroanatomy- and Pathology-Based Functional Examinations of Experimental Stroke in Rats: Development and Validation of a New Behavioral Scoring System
Source: Front Behav Neurosci. 2018 Dec 18;12:316. doi: 10.3389/fnbeh.2018.00316 (PMC6305474; doi:10.3389/fnbeh.2018.00316)
Supplement: Supplementary file 2 [file Data_Sheet_1.xlsx]

## Sheet: Discovery
Is duration	BW	Dir-infarct vol	Dir-Infarct(%)	Ind-Infarct vol	Ind-Infarct(%)	TTC contra vol	time(rep-behavior)	BG	M1	S1 FL	S1 HL	S1 BF	IC	Garcia1	Garcia2	Garcia3	Garcia4	Garcia5	Garcia6	Subscore7
0.5	248	14.2	6	17.4	2.5	685.8	72	1	0	0	0	0	1	3	3	3	3	3	3	3
0.5	242	0	0	0	0	667.1	96	0	0	0	0	0	0	3	3	3	3	3	3	3
0.5	249	44.5	5	41.2	5	893.5	96	1	0	0	0	0	1	3	3	3	3	3	3	3
0.5	229	7.5	1	9	1	608.1	24	1	0	0	0	0	0	3	3	3	3	3	3	3
0.5		37.4	7	34.4	6	548.9	24	1	0	0	0	1	0	3	3	3	3	3	3	3
0.5	239	18.5	4	18.7	2.5	760.4	72	1	0	0	0	0	1	3	2	3	3	3	3	3
0.75	270	22.6	5	14.9	3	559.7	48	1	0	0	0	0	0	2	3	3	3	3	3	3
0.75	260	55.6	9	52.7	8	691.6	99	1	0	0	0	0	0	3	2	3	3	2	3	3
0.75	251	125.4	25	110.1	15	752.6	99	1	0	1	0	0	1	3	2	3	3	2	2	3
0.75	245	50	9	43.6	7	587.2	24	1	0	0	0	1	1	3	2	2	2	3	2	3
0.75	235	366.9	67	270.8	50	544.1	24	1	1	1	1	1	1	2	2	2	1	1	1	2
1	250	80.6	14	77.5	13	604.9	72	1	0	0	0	0	1	3	2	3	3	3	3	3
1	227	55.9	9	39.7	7	611.6	96	1	0	0	0	0	1	3	3	3	2	3	3	3
1	210	88.1	15	68.6	12	596.7	40	1	0	1	1	1	1	3	2	2	2	3	3	3
1	283	94.8	14	88	13	656.7	24	1	0	0	0	0	1	3	2	3	3	1	2	3
1	246	187.4	27	156.1	24	649.5	96	1	0	1	0	1	1	3	2	2	1	3	3	3
1	239	110.1	24	98	17	581.4	48	1	0	0	0	0	1	1	2	2	2	3	3	2
1	237	392.4	73	360.3	60	604.4	48	1	1	1	1	1	1	1	2	2	2	1	1	2
1.5	251	160.6	25	159	21	766.1	96	1	0	1	0	0	1	3	2	3	2	3	3	3
1.5	267	45.9	20	40.5	8	484.6	24	1	0	0	0	0	1	2	2	2	1	1	3	2
1.5	271	173.3	38	110.3	24	450.2	24	1	0	0	0	1	1	3	2	2	2	1	1	2
1.5	261	344.2	69	310.9	58	537.8	24	1	1	1	1	1	1	3	2	2	1	1	2	2
1.5	243	332.5	55	268.5	44	609.1	24	1	1	1	1	1	1	2	2	2	1	1	1	2
2	243	116.2	18	82.6	13	647.7	96	1	0	0	0	0	1	3	3	3	3	3	3	3
2	240	52.3	8	40.2	6	636.7	72	1	0	0	0	0	1	3	2	2	3	3	3	3
2	237	95.9	18	94.8	17	545.1	72	1	0	0	0	0	1	3	2	2	2	2	2	3
2	228	268	52	215.4	41	520.1	72	1	0	1	0	1	1	3	2	3	2	2	1	3
2	233	258.1	46	230.9	41	566.5	72	1	1	1	1	1	1	3	2	2	2	1	1	3
3	236	218	33	158.1	23	695.1	48	1	0	0	0	1	1	3	2	2	2	1	2	3
3	241	387.7	68	323.1	52	617.7	48	1	1	0	1	1	1	1	2	2	2	1	1	2
3	236	464.4	79	385.9	60	644.4	48	1	1	0	1	1	1	1	2	2	1	1	1	2

## Sheet: Validatation
Is duration	BW	Dir-infarct vol	Dir-Infarct%	Ind-Infarct vol	Ind-Infarct (%)	TTC contra vol	BG	M1	S1 FL	S1 HL	S1 BF	IC	time(rep-behavior)	Garcia1	Garcia2	Garcia3	Garcia4	Garcia5	Garcia6	Subscore7	T2 infarct vol	T2 contra vol	DW infarct vol	DW contra vol	T2 Infarct%	DWI infarct%
0.5	209	89.5	15	65	11	580.9	1	0	0	0	0	1	40	2	2	2	2	3	3	3
0.5	220	134.3	21	124.5	19	653.5	1	0	0	0	1	1	72	3	2	3	2	3	3	3
0.75	261	30.7	6	9.7	2	535.7	1	0	0	0	0	0	48	3	3	3	3	3	3	3
0.75	244	33.3	5	30.8	5	564.7	1	0	0	0	0	0	48	3	3	3	3	3	3	3
0.75	265	245.6	42	179.4	31	581.5	1	1	1	0	1	1	21	0	2	2	2	1	1	2	165.7	545.1	158.8	524.1	30	30
0.75	300	46.3	9	15.4	3	519.6	1	0	0	0	0	1	20	2	3	3	2	3	3	3	31.2	554.7	36	538.9	6	7
0.75	228	84.6	13	73.8	11	652.1	1	0	0	0	1	1	22	3	3	3	3	1	1	3	28	571.3	24.5	572.5	5	4
1	224	160.7	28	108.3	19	573.1	1	1	1	0	1	1	96	2	2	3	3	2	2	3
1	239	151.2	29	98.3	19	526.8	1	0	0	0	1	1	96	3	2	3	2	2	3	3
1	260	57.1	9	43.7	7	625.7	1	0	0	0	0	1	22	3	2	2	2	3	3	3	46.8	550.7	47.3	556.6	8	8
1	262	22.6	4	13.5	4	622.9	1	0	0	0	0	0	21	2	2	2	2	3	3	3	18.5	573	10.9	568.2	3	2
1	305	138	21	123	19	642.1	1	0	0	0	1	1	47	3	2	3	2	2	2	3	107.7	549.7	105.5	551.2	20	19
1	282	100.7	16	66.9	11	629.8	1	0	0	0	0	1	47	1	2	2	1	1	3	2	71.9	585.7	79.8	568.6	12	14
1	319	130.6	19	115.1	17	675.1	1	1	0	0	1	1	48	3	2	2	2	3	3	3
1	230	575	104	428.3	78	552.7	1	1	1	1	1	1	45	1	2	2	1	1	1	2	432.9	506	386.9	487.2	86	79
1	251	146.5	22	111.4	17	653.5	1	0	1	0	1	1	44	3	2	2	2	3	3	3	56.8	558.8	57.8	576.1	10	10
1	239	471.5	75	378.4	60	630.6	1	1	1	1	1	1	22	0	2	2	1	1	2	2
1	285	211.2	36	152.6	26	583.6	1	0	1	0	1	1	20	0	2	2	1	1	1	2
1	265	99	17	85.5	14	594.5	1	0	0	0	0	1	20	3	2	3	3	3	3	3
1	245	378.2	60	310.5	49	635.4	1	1	1	1	1	1	19	1	2	2	1	1	1	2
1	265	221.2	32	210.5	30	699.7	1	1	1	1	1	1	19	2	2	2	1	1	1	2
1	336	430.6	72	352.1	59	601.2	1	1	1	1	1	1	22	2	2	2	2	1	1	2
1.5	244	290.3	53	238.1	43	552.8	1	1	1	1	1	1	48	2	2	2	1	1	1	2
1.5	266	251.3	42	219.6	36	604.8	1	1	1	0	1	1	48	3	2	2	2	1	1	3
1.5	243	360.1	60	322.7	54	597.3	1	1	1	1	1	1	96	3	2	2	2	1	1	3
1.5	224	385.8	66	349.1	60	584.3	1	1	1	1	1	1	96	1	2	2	1	1	1	2
1.5	220	433.4	77	365.6	65	560	1	1	1	1	1	1	23	0	2	2	2	1	1	2
1.5	219	327	66	247.5	50	494.6	1	1	1	1	1	1	72	0	2	2	1	1	1	3
1.5	223	186.2	33	116.7	21	557.6	1	1	1	0	1	1	72	0	2	2	2	2	1	3
1.5	226	567.1	94	491.7	81	606.3	1	1	1	1	1	1	22	1	2	2	1	1	1	2
1.5	181	394.1	66	333.8	56	592.9	1	1	1	1	1	1	43	1	2	2	1	1	1	2	344.6	540.5	323.6	517.2	64	63
1.5	191	153.8	24	136.3	22	628.4	1	0	0	0	1	1	43	2	2	2	2	1	1	2	133.9	545.5	130	527	25	25
1.5	204	409.5	66	324.9	52	621.2	1	1	1	1	1	1	24	1	2	2	1	2	1	2
1.5	245	113.3	20	99.6	17	579.8	1	1	0	0	0	1	27	2	2	2	2	3	3	3
1.5	240	111.4	21	85.2	16	542.7	1	0	0	0	1	1	27	1	2	2	2	1	3	2
1.5	307	208.7	32	189.8	29	645.2	1	1	1	1	1	1	25	2	2	2	2	1	1	2
2	227	218.5	39	158.5	28	564.3	1	0	1	0	1	1	40	2	2	2	1	1	1	2
2	226	563.5	86	473.7	72	657.7	1	1	1	1	1	1	72	0	2	2	1	1	1	1
2	320	122.4	21	85.5	15	577.3	1	1	0	0	1	1	21	0	2	2	1	1	1	2
3	232	409.8	76	373.3	69	538.6	1	1	1	1	1	1	96	2	2	2	1	2	1	3
3	237	500.7	87	388.5	68	575.2	1	1	1	1	1	1	96	1	2	2	1	1	1	2
3	219	440.7	70	386.4	62	626.4	1	1	1	1	1	1	96	1	2	2	2	1	1	2

## Sheet: inter-rater reliability
Rat	Rater_1	Rater_2
151-1	3	3
151-2	2	3
151-3	3	3
151-4	2	2
151-5	3	3
151-6	3	3
151-7	3	3
152-1	0	0
152-2	2	2
152-3	2	2
152-4	1	1
152-5	1	1
152-6	1	1
152-7	2	2
153-1	3	3
153-2	2	2
153-3	3	3
153-4	3	3
153-5	3	3
153-6	3	3
153-7	3	3
154-1	1	1
154-2	2	2
154-3	2	2
154-4	1	1
154-5	1	1
154-6	1	1
154-7	2	2
155-1	2	2
155-2	2	2
155-3	2	2
155-4	1	1
155-5	1	1
155-6	1	1
155-7	2	3
178-1	2	2
178-2	2	2
178-3	2	2
178-4	1	1
178-5	1	1
178-6	1	1
178-7	2	2
179-1	2	2
179-2	2	2
179-3	3	2
179-4	3	3
179-5	3	3
179-6	3	3
179-7	3	3
180-1	0	0
180-2	2	2
180-3	2	2
180-4	1	1
180-5	1	1
180-6	1	1
180-7	1	1
176-1	3	3
176-2	3	2
176-3	3	3
176-4	3	3
176-5	3	3
176-6	3	3
176-7	3	3
177-1	3	3
177-2	2	2
177-3	3	3
177-4	2	2
177-5	3	3
177-6	3	3
177-7	3	3
171-1	2	2
171-2	2	2
171-3	2	2
171-4	1	1
171-5	1	1
171-6	2	2
171-7	3	3
172-1	1	1
172-2	2	2
172-3	2	2
172-4	1	1
172-5	1	1
172-6	1	1
172-7	2	2
173-1	3	3
173-2	2	2
173-3	2	2
173-4	1	1
173-5	2	2
173-6	1	2
173-7	3	3

## Sheet: time
Rat	time_s
151-1	300
151-2	32
151-3	16
151-4	90
151-5	19
151-6	19
151-7	24
152-1	300
152-2	4
152-3	13
152-4	19
152-5	26
152-6	35
152-7	33
153-1	300
153-2	5
153-3	11
153-4	222
153-5	21
153-6	30
153-7	40
154-1	300
154-2	11
154-3	12
154-4	26
154-5	10
154-6	31
154-7	22
155-1	300
155-2	5
155-3	14
155-4	44
155-5	35
155-6	79
155-7	34
156-1	300
156-2	6
156-3	18
156-4	88
156-5	10
156-6	10
156-7	33
157-1	300
157-2	6
157-3	6
157-4	51
157-5	15
157-6	15
157-7	16
158-1	300
158-2	10
158-3	19
158-4	64
158-5	13
158-6	17
158-7	35
159-1	300
159-2	3
159-3	11
159-4	57
159-5	20
159-6	24
159-7	19
160-1	300
160-2	2
160-3	8
160-4	62
160-5	39
160-6	25
160-7	19
161-1	300
161-2	2
161-3	8
161-4	174
161-5	44
161-6	22
161-7	23
162-1	300
162-2	3
162-3	7
162-4	70
162-5	46
162-6	25
162-7	17
163-1	300
163-2	8
163-3	10
163-4	83
163-5	11
163-6	25
163-7	23
165-1	300
165-2	3
165-3	7
165-4	50
165-5	16
165-6	18
165-7	37
168-1	300
168-2	3
168-3	15
168-4	177
168-5	21
168-6	7
168-7	20
169-1	300
169-2	3
169-3	5
169-4	103
169-5	19
169-6	12
169-7	9
170-1	300
170-2	2
170-3	6
170-4	53
170-5	11
170-6	19
170-7	19
